# Supplementary material for: Validity of the Maximal Heart Rate Prediction Models among Runners and Cyclists
Source: MDPI journal article supplement (doi:10.3390/jcm12082884), 2023-04-14

## **Supplementary Material S2. Prediction performance of selected maximal heart rate prediction models.**

Supplementary Material 2. Prediction performance of selected maximal heart rate prediction models. Abbreviations: HRmax, maximal heart rate. Data are presented in beats·min<sup>-1</sup>. Dotted lines represent mean bias of agreement. Panels illustrate the performance of the following equations: A- Nes et al. (running CPET); B- Machado et al. (running CPET); C- Tanaka et al. (running CPET); D- Fox et al. (running CPET); E- Londeree et al. (running CPET); F- Inbar et al. (running CPET); G- Gellish et al. (running CPET); H- Arena et al. (running CPET); I- Tanaka et al. (cycling CPET); J- Fox et al. (cycling CPET); K- Londeree et al. (cycling CPET); L- Fairbairn et al. (cycling CPET); M- Arena et al. (cycling CPET).

Observed HRmax - Predicted HRmax (bpm)

40  
20  
0  
-20  
-40  
-60  
-80

150

160

170

180

190

200

210

Mean of Observed and Predicted HRmax (bpm)

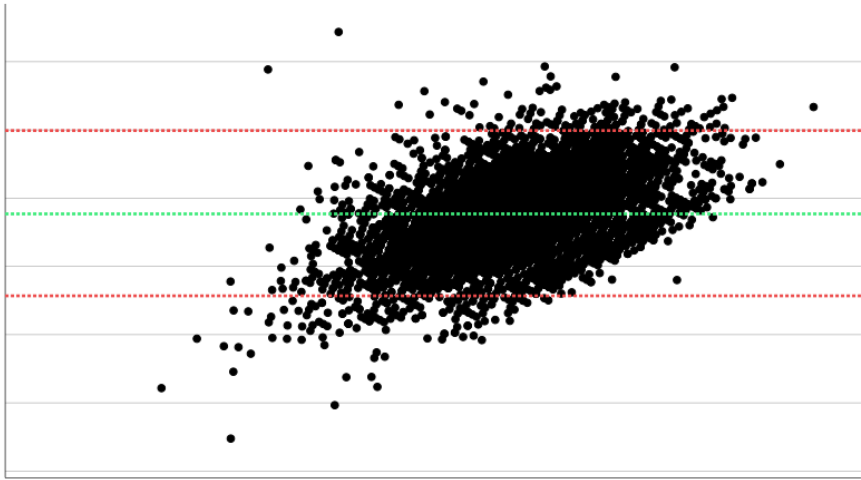

Observed HRmax - Predicted HRmax (bpm)

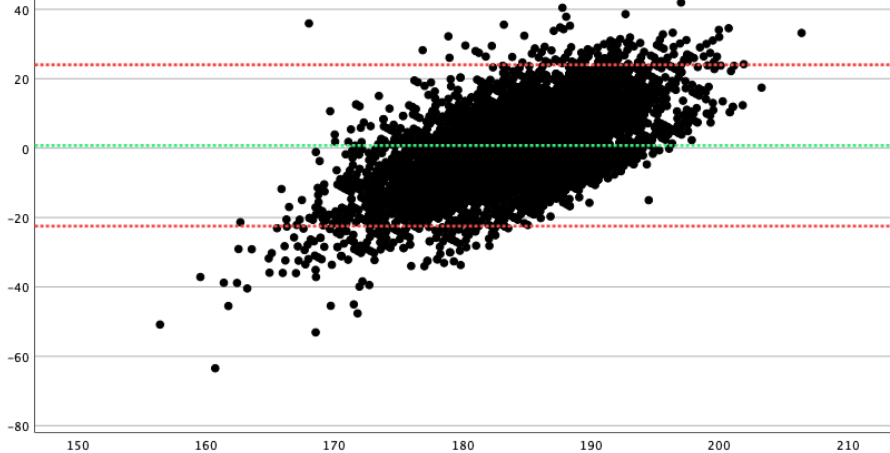

Mean of Observed and Predicted HRmax (bpm)

Observed HRmax - Predicted HRmax (bpm)

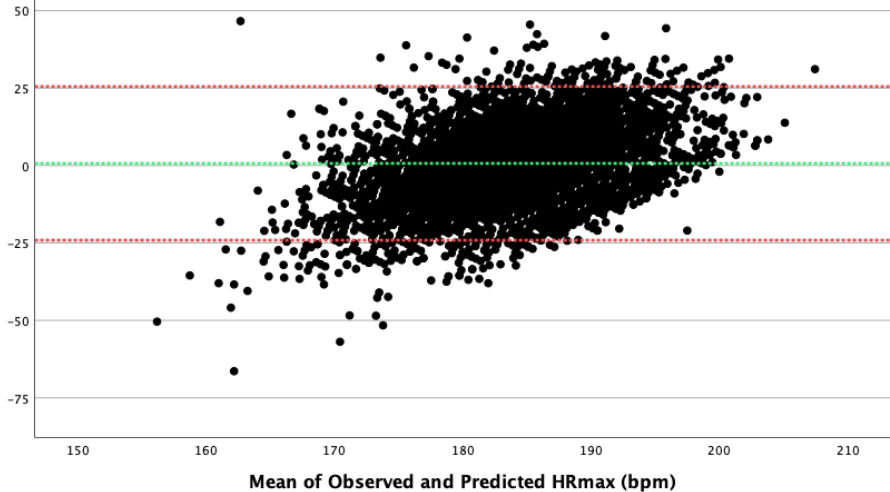

Observed HRmax - Predicted HRmax (bpm)

60  
30  
0  
-30  
-60

150

160

170

180

190

200

210

Mean of Observed and Predicted HRmax (bpm)

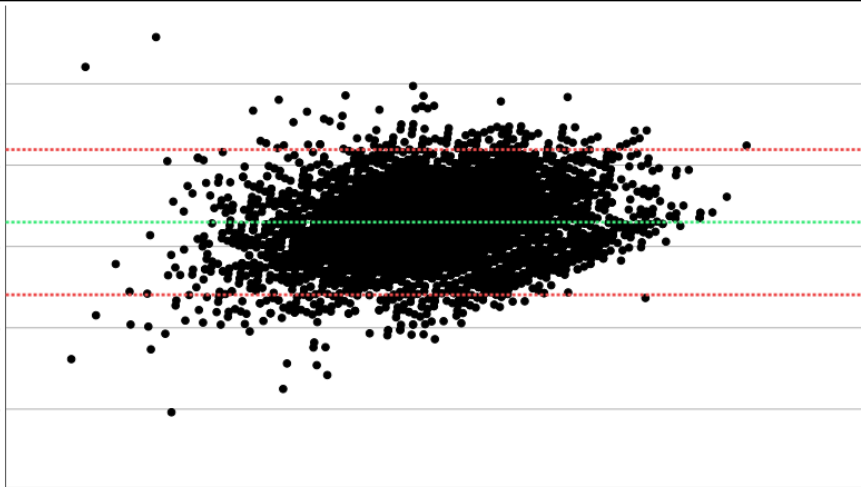

Observed HRmax - Predicted HRmax (bpm)

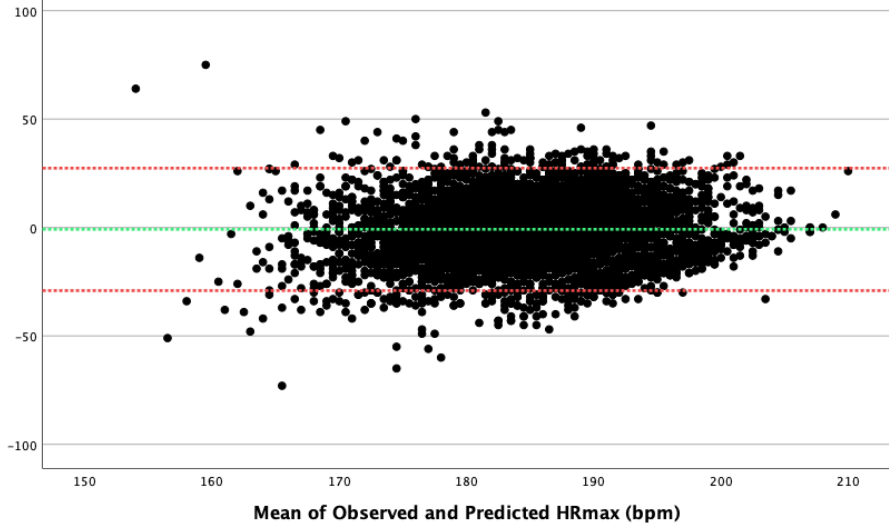

Observed HRmax - Predicted HRmax (bpm)

60  
30  
0  
-30  
-60

150

160

170

180

190

200

210

Mean of Observed and Predicted HRmax (bpm)

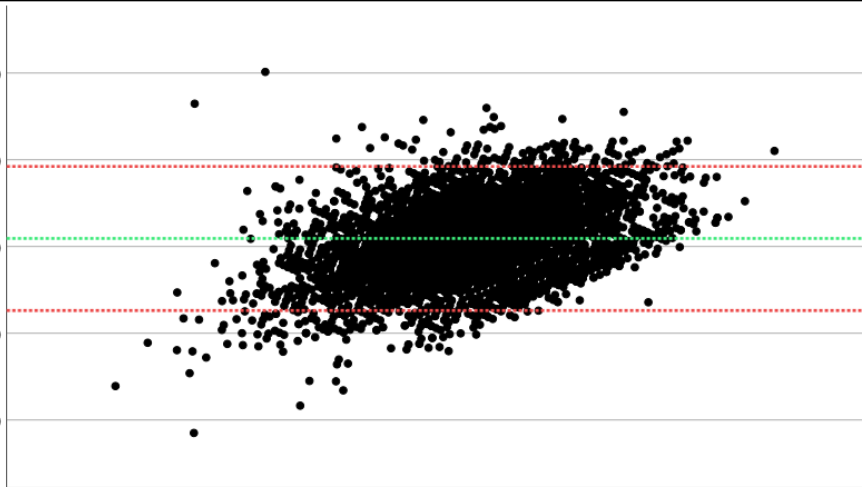

Observed HRmax - Predicted HRmax (bpm)

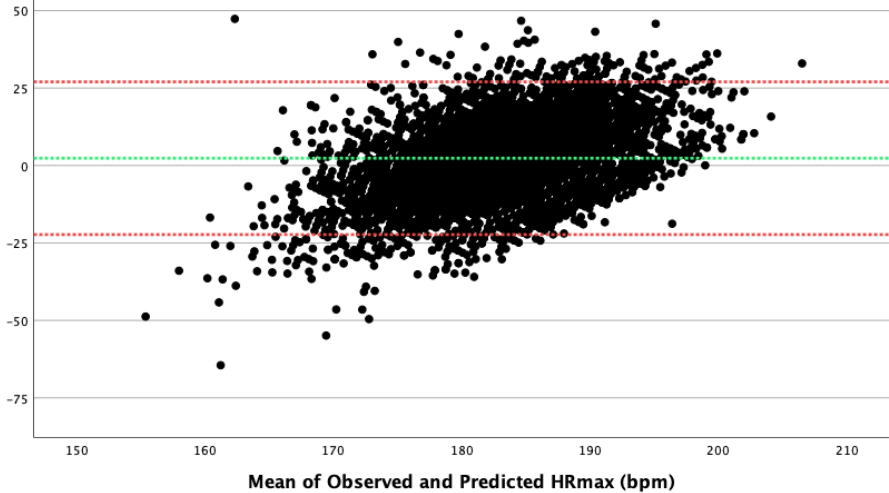



Observed HRmax - Predicted HRmax (bpm)

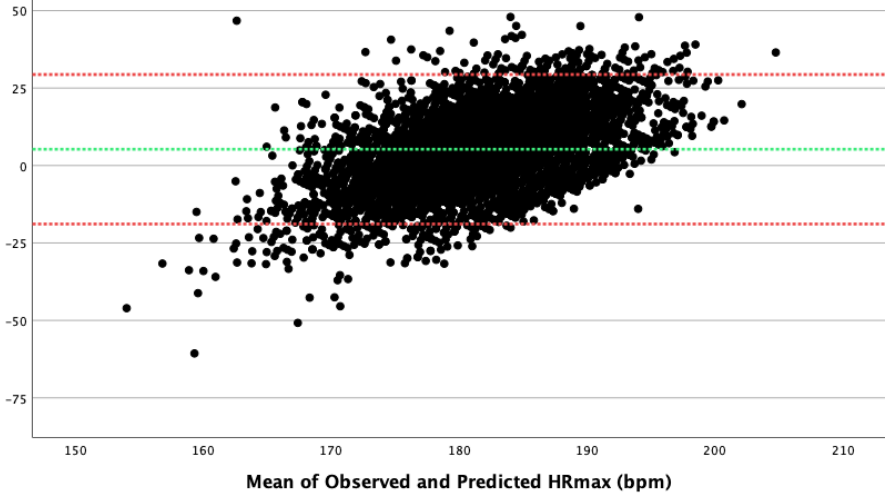

Observed HRmax - Predicted HRmax (bpm)

50  
25  
0  
-25  
-50  
-75

150

160

170

180

190

200

210

Mean of Observed and Predicted HRmax (bpm)

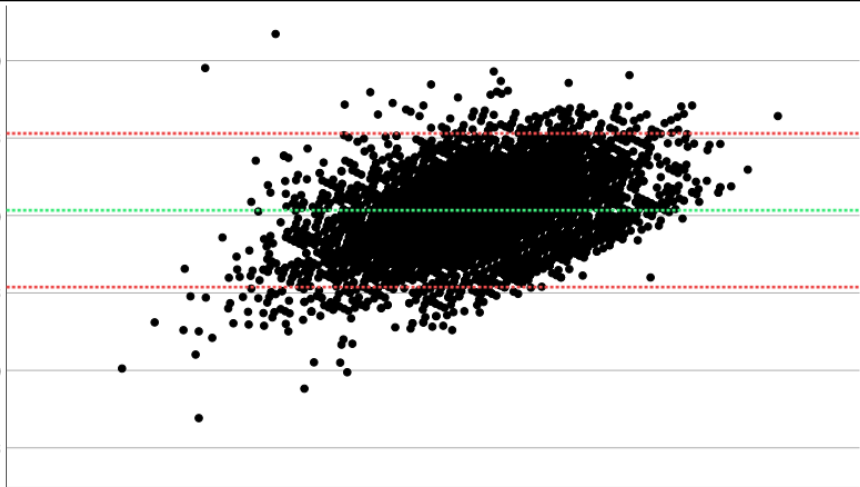

Observed HRmax - Predicted HRmax (bpm)

50  
25  
0  
-25  
-50  
-75

150

160

170

180

190

200

210

Mean of Observed and Predicted HRmax (bpm)

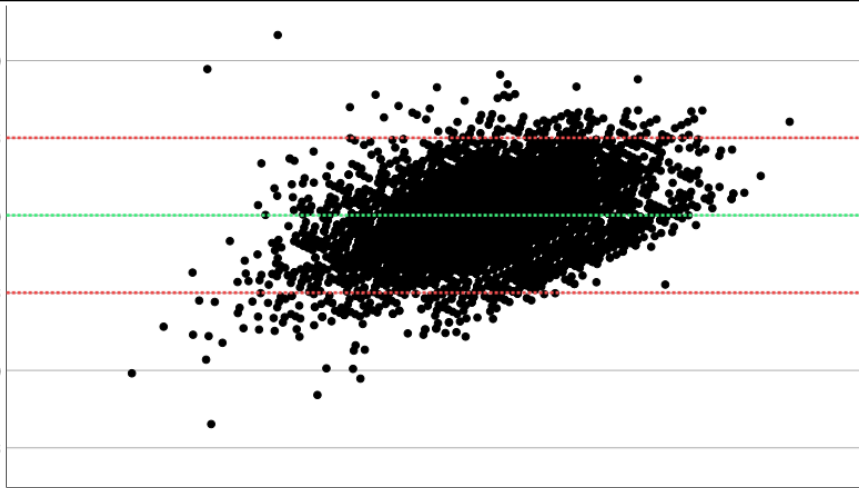

Observed HRmax - Predicted HRmax (bpm)

60  
30  
0  
-30  
-60

160

180

200

220

Mean of Observed and Predicted HRmax (bpm)

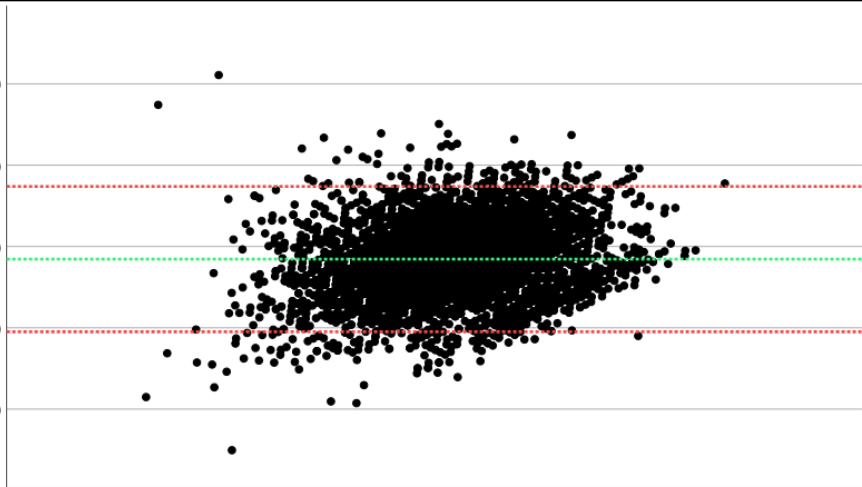

Observed HRmax - Predicted HRmax (bpm)

60  
30  
0  
-30  
-60

160

180

200

220

Mean of Observed and Predicted HRmax (bpm)

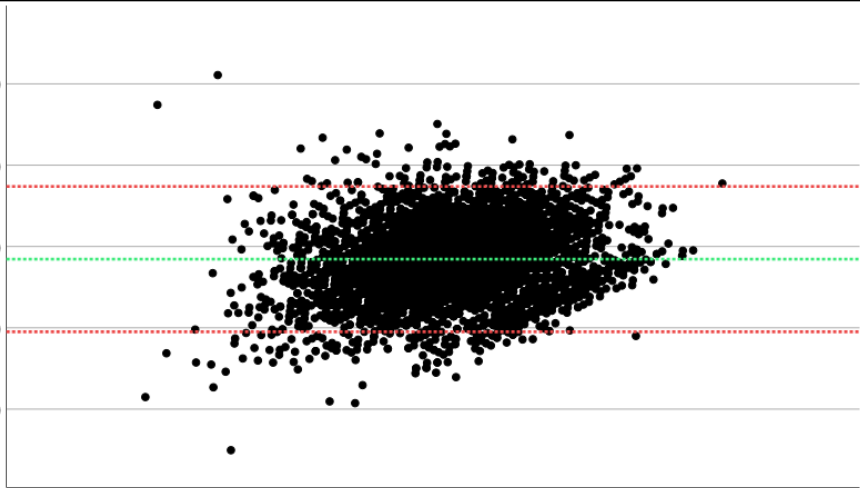

Observed HRmax - Predicted HRmax (bpm)

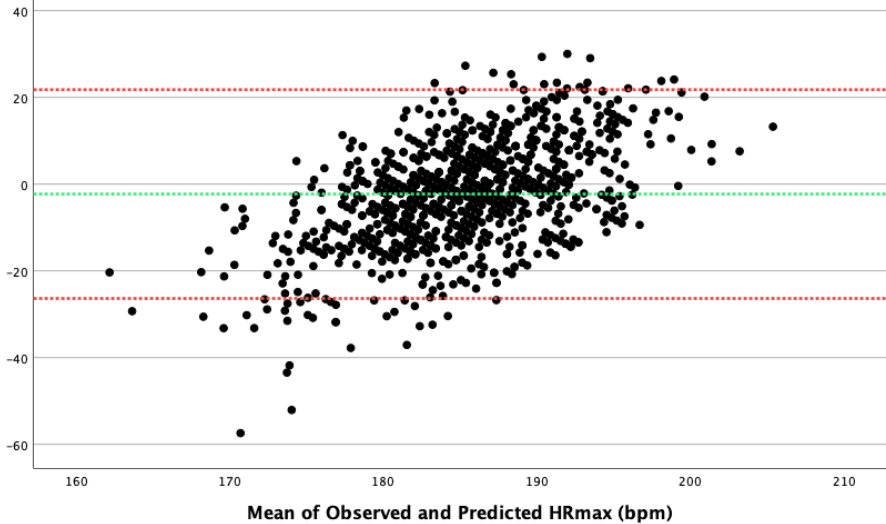

Observed HRmax - Predicted HRmax (bpm)

60  
30  
0  
-30  
-60

150

160

170

180

190

200

210

Mean of Observed and Predicted HRmax (bpm)

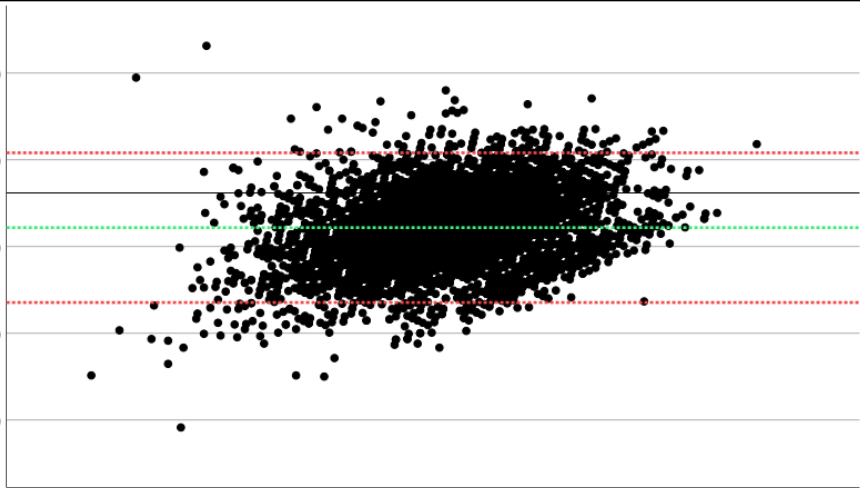

Observed HRmax - Predicted HRmax (bpm)

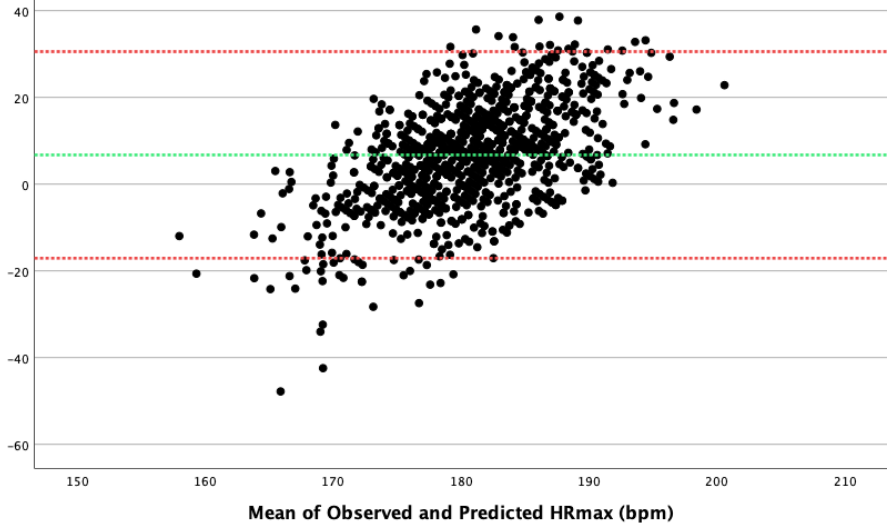



Observed HRmax - Predicted HRmax (bpm)

50  
25  
0  
-25  
-50  
-75

150

160

170

180

190

200

210

Mean of Observed and Predicted HRmax (bpm)

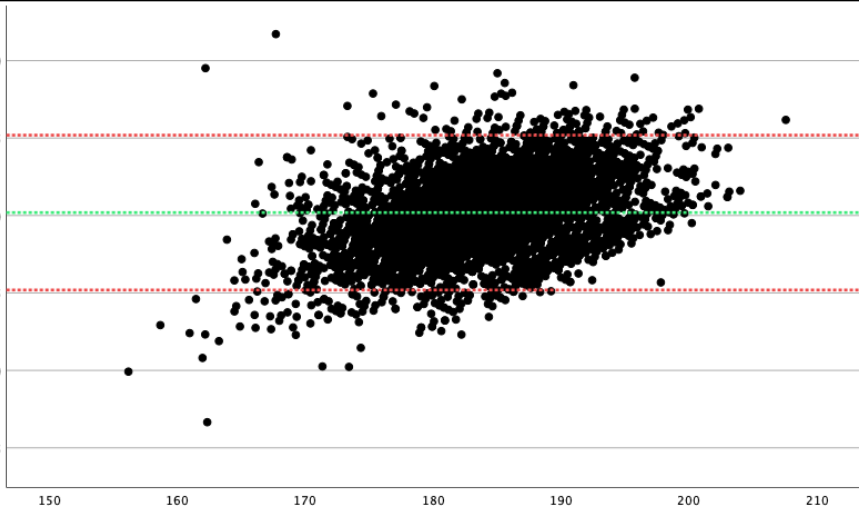

Observed HRmax - Predicted HRmax (bpm)

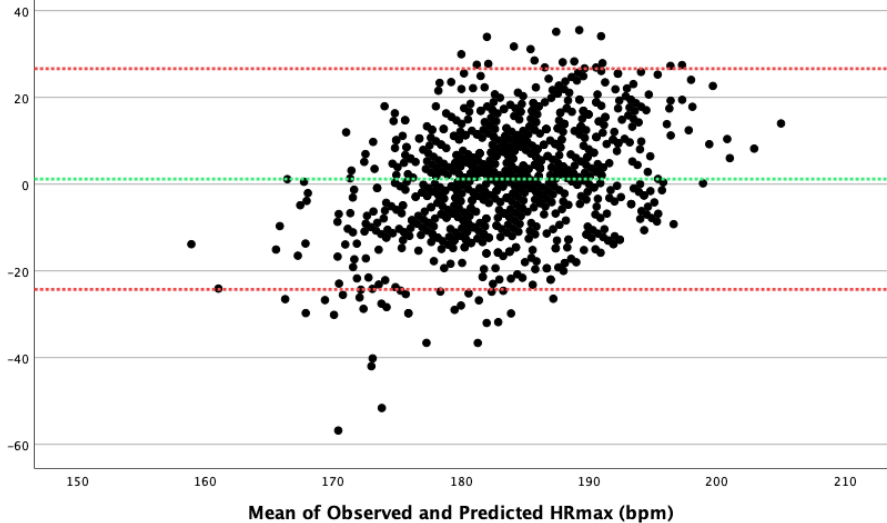

Observed HRmax - Predicted HRmax (bpm)

100  
50  
0  
-50  
-100

160

180

200

220

Mean of Observed and Predicted HRmax (bpm)

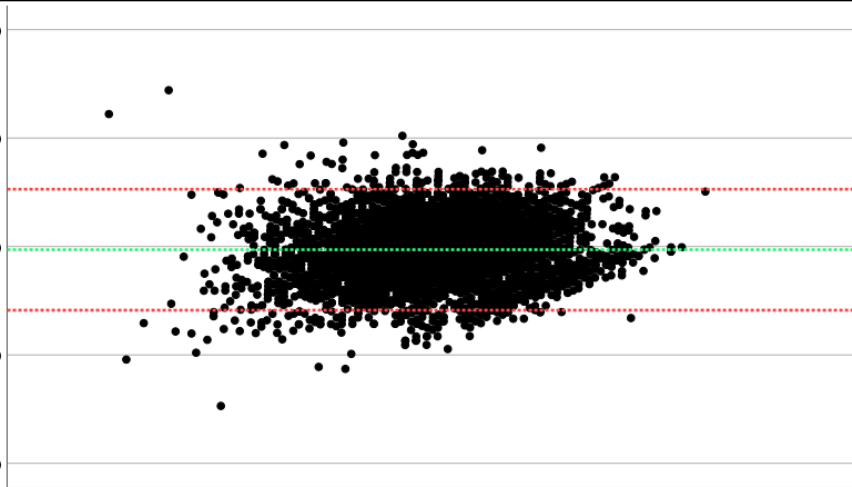

Observed HRmax - Predicted HRmax (bpm)

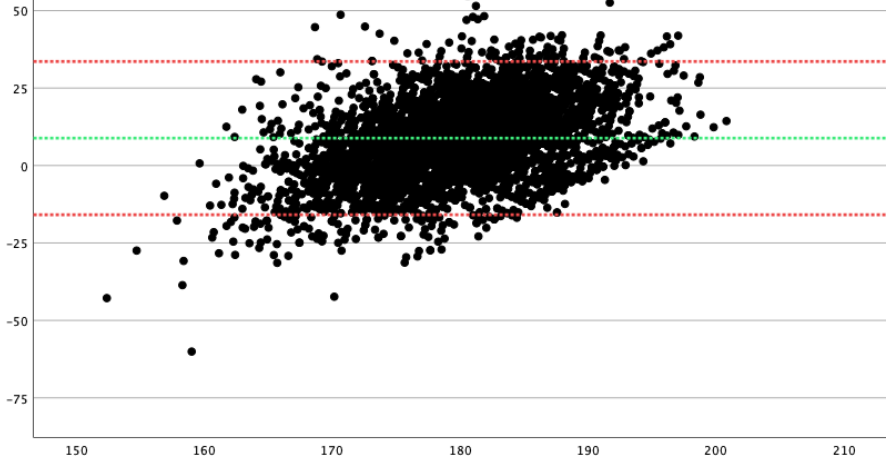

Mean of Observed and Predicted HRmax (bpm)

Observed HRmax - Predicted HRmax (bpm)

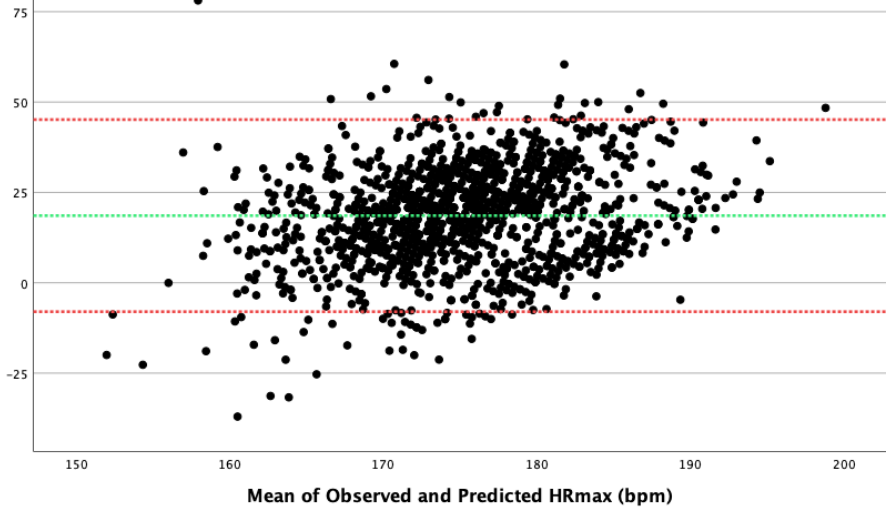

Supplement: s1 [file s1]
